# Supplementary material for: Quality by Design (QbD) approach for the development of a rapid UHPLC method for simultaneous determination of aglycone and glycoside forms of isoflavones in dietary supplements
Source: Royal Society of Chemistry journal article supplement (doi:10.1039/c9ay02778e), 2020-01-01
Supplement: c9ay02778e1.pdf [file c9ay02778e1.pdf]

## Supplementary information

### **Quality by Design (QbD) approach to the development of a rapid UHPLC method for simultaneous determination of aglycone and glycoside forms of isoflavones in dietary supplements**

Kornelija Lasić<sup>1</sup>, Ana Mornar<sup>2</sup>, Biljana Nigović<sup>2\*</sup>

<sup>1</sup> R&D, PLIVA Croatia Ltd, TEVA Group Member, Prilaz baruna Filipovića 25, 10000 Zagreb, Croatia

<sup>2</sup> Department of Pharmaceutical Analysis, University of Zagreb, Faculty of Pharmacy and Biochemistry, A. Kovačića 1, 10000 Zagreb, Croatia

Correspondence to: Biljana Nigović, University of Zagreb, Faculty of Pharmacy and Biochemistry, A. Kovačića 1, 10 000 Zagreb, Croatia. E-mail: bnigovic@pharma.hr

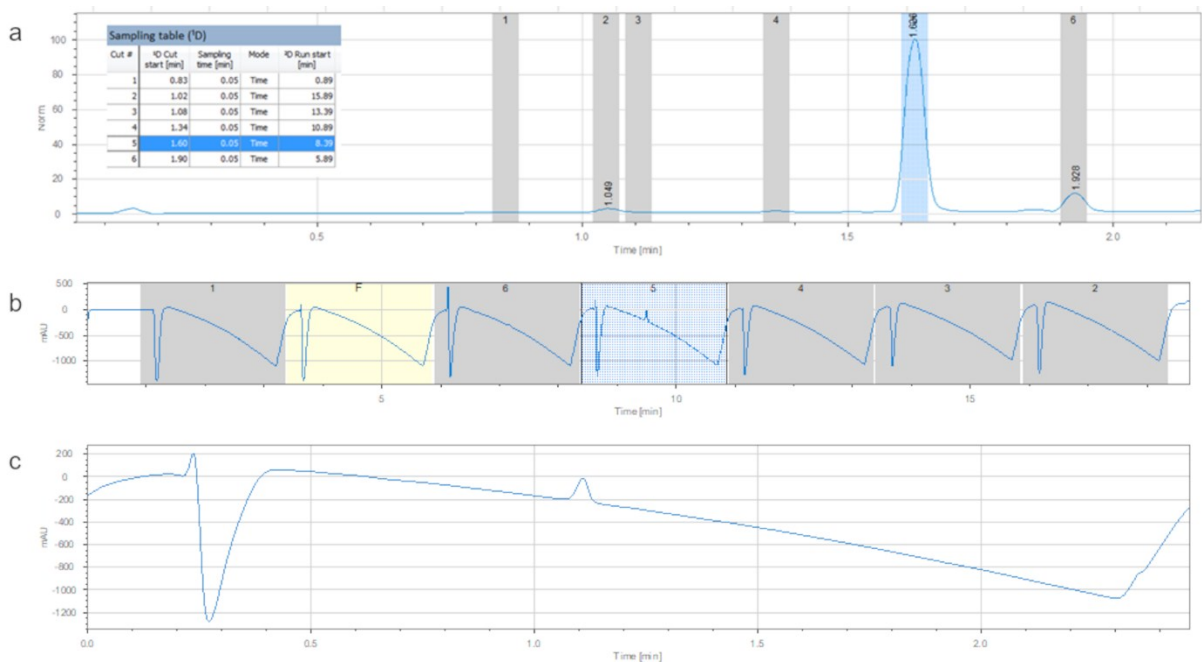

**Fig. 1S** Chromatograms of the dietary supplement sample 5: 1D chromatogram with six cuts where first cut is blank and five cuts are of detected isoflavones (a); overview of all 2D chromatograms of six cuts and additional flush cut in yellow colour (b); 2D chromatogram of cut number five – formononetin, marked blue on a and b chromatograms (c).
